# Supplementary material
Source: PubMed Central journal article supplement (PMC5063983)
Supplement: 10.1074_M116.747121_jbc.M116.747121-2.pdf [file 10.1074_M116.747121_jbc.M116.747121-2.pdf]

Table S2. Strains and plasmids used in this study

| Strain or plasmid                      | Description                                                                                                                                                                                                                                                      | Reference or source    |                                                                 |                                                                 |
|----------------------------------------|------------------------------------------------------------------------------------------------------------------------------------------------------------------------------------------------------------------------------------------------------------------|------------------------|-----------------------------------------------------------------|-----------------------------------------------------------------|
| <b>Strain</b>                          |                                                                                                                                                                                                                                                                  |                        |                                                                 |                                                                 |
| DH5 $\alpha$                           | Cloning, F <sup>-</sup> $\Phi$ 80 <i>lacZ</i> $\Delta$ M15<br>$\Delta$ ( <i>lacZYA-argF</i> )<br>U169 <i>recA1 endA1 hsdR17</i> ( $\tau_k^-$ ,<br>$m_k^+$ ) <i>phoA supE44 thi-1</i><br><i>gyrA96 relA1 <math>\lambda</math></i>                                 | Invitrogen             |                                                                 |                                                                 |
| W3110                                  | Glycocompetent <i>E. coli rph-1</i><br>IN( <i>rrnD-rrnE</i> )                                                                                                                                                                                                    | (1)                    |                                                                 |                                                                 |
| BL21 (DE3)                             |                                                                                                                                                                                                                                                                  | New England<br>BioLabs |                                                                 |                                                                 |
| <i>Campylobacter jejuni</i><br>81-176  | Protein expression, <i>huA2 [lon]</i><br><i>ompT gal</i> ( $\lambda$ DE3) [ <i>dcm</i> ] $\Delta$ <i>hsdS</i><br>$\lambda$ DE3 = $\lambda$ <i>sBamH1o</i> $\Delta$ <i>EcoRI-B</i><br><i>int::(lacI::PlacUV5::T7 gene1)</i><br><i>i21 <math>\Delta</math>nin5</i> | (2)                    |                                                                 |                                                                 |
| <b>Plasmids</b>                        |                                                                                                                                                                                                                                                                  |                        |                                                                 |                                                                 |
|                                        |                                                                                                                                                                                                                                                                  |                        | <b>Forward primer</b>                                           | <b>Reverse primer</b>                                           |
| RK212.2                                | Helper plasmid for conjugation<br>Tet <sup>R</sup> , Carb <sup>R</sup>                                                                                                                                                                                           | (3)                    |                                                                 |                                                                 |
| pACYC:: <i>pgl</i>                     | Constitutive expression of <i>pgl</i><br>locus, Cm <sup>R</sup>                                                                                                                                                                                                  | (4)                    |                                                                 |                                                                 |
| pET24a                                 | Expression vector, IPTG<br>inducible, Kan <sup>R</sup>                                                                                                                                                                                                           | Novagen                |                                                                 |                                                                 |
| pET24a:: <i>peb3-cyt</i>               | $\Delta$ 1-20, deletion of Sec signal<br>sequence for cytoplasmic<br>expression, C-terminal his6x<br>tag                                                                                                                                                         | This study             | TAATTCATATGGATGTAAACCTTTACGGACC                                 | TCAGAAATCTGAGTTCTCTCCAGCCGTATT<br>T                             |
| pET24a:: <i>peb3-cyt</i> N90Q          | Mutation of glycosylation site                                                                                                                                                                                                                                   | This study             | GTGATTTTGGAAAAAGATTTTCAGGTGAGTAAA<br>ATCAAGCCTTTA               | TAAAGGCTTGATTTTACTCACCTGAAAATC<br>TTTCCAAAATCAC                 |
| pET24a:: <i>peb3-cyt</i> N90Q<br>D68N  | Substitution of glycosylation<br>consensus sequence DFNVS at<br>residues 66-70                                                                                                                                                                                   | This study             | GGTTTGAAAAGGCTAAAAAAGATTTTAATGTG<br>AGTTTTGGCGCTTCAGATCAATCG    | CGATTGATCTGAAGCGCCAAAACACTCACATT<br>AAAATCTTTTTAGCCTTTTCAAACC   |
| pET24a:: <i>peb3-cyt</i> N90Q<br>G72N  | Substitution of glycosylation<br>consensus sequence DFNVS at<br>residues 70-74                                                                                                                                                                                   | This study             | GGCTAAAAAAGATGCAGATATTGATTTTAATG<br>TGTCAGATCAATCGGCTTTAGCTATAG | CTATAGCTAAAGCCGATTGATCTGACACAT<br>TAAAATCAATATCTGCATCTTTTTTAGCC |
| pET24a:: <i>peb3-cyt</i> N90Q<br>Q152N | Substitution of glycosylation<br>consensus sequence DFNVS at<br>residues 150-154                                                                                                                                                                                 | This study             | GTTTGGGAAGATATGATAGGTGATTTTAATGT<br>GAGTAAAACCATACAAAATTTAGAAAC | GTTTCTAAAATTTTGATGGTTTTACTCACA<br>TTAAAATCACCTATCATATCTTCCCAAAC |

|                                      |                                                                                                               |            |                                                                   |                                                                    |
|--------------------------------------|---------------------------------------------------------------------------------------------------------------|------------|-------------------------------------------------------------------|--------------------------------------------------------------------|
| pET24a:: <i>peb3-cyt</i> N90Q A179N  | Substitution of glycosylation consensus sequence DFNVS at residues 177-181                                    | This study | CAAATAGTGGAAAGTCAAGAAAGGATTTTAA<br>TGTGAGTCAAGCCGATGCTTGGATCACTTG | CAAGTGATCCAAGCATCGGCTTGACTCACA<br>TTAAAAATCCTTTCTTGCACTTCCACTATTTG |
| pET24a:: <i>peb3-cyt</i> N90Q I199N  | Substitution of glycosylation consensus sequence DFNVS at residues 197-201                                    | This study | GACTGGTCAAAAAGCAATGATTTTAATGTGAG<br>TGCCGTAGCTATAGAAA             | TTTCTATAGCTACGGCACTCACATTTAAAT<br>CATTGCTTTTTGACCAGTC              |
| pET22b:: <i>ycbK</i>                 | <i>pelB</i> sequence replaced with <i>E. coli ycbK</i> signal sequence (TAT)                                  | This study | TAATTCATATGGACAAATTCGACGCTAATCG                                   | TCAGAAAGGATCCGAGTGTTGCAAACGCA<br>GGGGTCG                           |
| pET22b:: <i>torAcj</i>               | <i>pelB</i> sequence replaced with <i>C. jejuni torA</i> signal sequence (TAT)                                | This study | TAATTCATATGCTAGATAGAAGAAAATTTT<br>AAAAATTG                        | TCAGAAAGGATCCTTTTGAAGCTTCTACGG<br>TTTTCTCTGC                       |
| pBAD::mNectarine                     | Expression vector, arabinose inducible, Amp <sup>R</sup>                                                      | (5)        |                                                                   |                                                                    |
| pBAD:: <i>peb3</i>                   | Full length <i>peb3</i> , C-terminal his tag                                                                  | This study | TAATTCATGAAAAAAAAATTACTTTATTTG<br>G                               | TCAGAAGAATTCCTCAGTGGTGGTGGTGGT<br>GTGCTCG                          |
| pBAD:: <i>ycbK::peb3</i>             | Replacement of Sec signal sequence (1-20) with Tat signal sequence from <i>ycbK</i>                           | This study | TAATTCATGAAAAGACAAATTCGACGCTAATC<br>GCC                           | TCAGAAGAATTCCTCAGTGGTGGTGGTGGT<br>GTGCTCG                          |
| pBAD:: <i>pelB::acrA</i>             | <i>pelB</i> N-terminal signal sequence replaced 1-22                                                          | This study | TAATTCATGAAATACCTGCTGCCGACCGCTG<br>CT                             | TCAGAAGAATTCCTCAGTGGTGGTGGTGGT<br>GTGCTCG                          |
| pBAD:: <i>ycbK::acrA</i>             | <i>ycbK</i> N-terminal signal sequence replaced 1-22                                                          | This study | TAATTCATGAAAAGACAAATTCGACGCTAATC<br>GCC                           | TCAGAAGAATTCCTCAGTGGTGGTGGTGGT<br>GTGCTCG                          |
| pCE111/28                            | <i>C. jejuni</i> expression vector, Cm <sup>r</sup> <i>flaA s<sup>28</sup></i> promoter, derivative of pRY111 | (6, 7)     |                                                                   |                                                                    |
| pCE111/28::rbs                       | Insertion of RBS before BamHI site                                                                            | This study | GATCAGAAGGAGATATAG                                                | GATCCTATATCTCCTTCT                                                 |
| pCE111/28H::rbs                      | Insertion of His-tag after XhoI site                                                                          | This study | TCGAGCACCACCACCACCACCTGAGGTAC                                     | CTCAGTGGTGGTGGTGGTGGTGC                                            |
| pCE111/28 H::rbs:: <i>peb3</i>       | Full length <i>peb3</i>                                                                                       | This study |                                                                   |                                                                    |
| pCE111/28 H::rbs:: <i>torA::peb3</i> | <i>torAcj</i> N-terminal signal sequence replaced 1-22                                                        | This study |                                                                   |                                                                    |
| pCE111/28 H::rbs:: <i>pelB::acrA</i> | <i>pelB</i> N-terminal signal sequence replaced 1-22                                                          | This study |                                                                   |                                                                    |
| pCE111/28H::rbs:: <i>torA::acrA</i>  | <i>torAcj</i> N-terminal signal sequence replaced 1-22                                                        | This study |                                                                   |                                                                    |

Restriction sites are underlined

1. Hayashi, K., Morooka, N., Yamamoto, Y., Fujita, K., Isono, K., Choi, S., Ohtsubo, E., Baba, T., Wanner, B. L., Mori, H., and Horiuchi, T. (2006) Highly accurate genome sequences of *Escherichia coli* K-12 strains MG1655 and W3110. *Mol Syst Biol.* **2**, 2006.0007
2. Korlath, J. A., Osterholm, M. T., Judy, L. A., Forfang, J. C., and Robinson, R. A. (1985) A point-source outbreak of campylobacteriosis associated with consumption of raw milk. *J Infect Dis.* **152**, 592–596
3. Figurski, D. H., and Helinski, D. R. (1979) Replication of an origin-containing derivative of plasmid RK2 dependent on a plasmid function provide. *Proc. Natl. Acad. Sci. U.S.A.* **76**, 1648–1652
4. Wacker, M., Linton, D., Hitchen, P. G., Nita-Lazar, M., Haslam, S. M., North, S. J., Panico, M., Morris, H. R., Dell, A., Wren, B. W., and Aebi, M. (2002) N-linked glycosylation in *Campylobacter jejuni* and its functional transfer into *E. coli*. *Science.* **298**, 1790–1793
5. Johnson, D. E., Ai, H.-W., Wong, P., Young, J. D., Campbell, R. E., and Casey, J. R. (2009) Red fluorescent protein pH biosensor to detect concentrative nucleoside transport. *J Biol Chem.* **284**, 20499–20511
6. Larsen, J. C., Szymanski, C., and Guerry, P. (2004) N-linked protein glycosylation is required for full competence in *Campylobacter jejuni* 81-176. *J Bacteriol.* **186**, 6508–6514
7. Yao, R., Alm, R. A., Trust, T. J., and Guerry, P. (1993) Construction of new *Campylobacter* cloning vectors and a new mutational cat cassette. *Gene.* **130**, 127–130
